# Supplementary material for: Change in prevalence of chronic kidney disease in England over time: comparison of nationally representative cross-sectional surveys from 2003 to 2010
Source: HighWire-hosted journal article supplement (doi:10.1136/bmjopen-2014-005480), 2014-09-01
Supplement: bmjopen-2014-005480supp.pdf [file bmjopen-2014-005480supp.pdf]

**Appendix 1: Medication use in key subgroups who reported yes to taking doctor prescribed medication**

|                                          |                          | 2003   |              |              | 2009-10 |             |              |
|------------------------------------------|--------------------------|--------|--------------|--------------|---------|-------------|--------------|
| Group                                    | Drug type                | Number | Yes (%)      | No (%)       | Number  | Yes (%)     | No (%)       |
| Any Doctor-diagnosed hypertension        | Diuretics                | 2118   | 523 (24.7%)  | 1595 (75.3%) | 1501    | 378 (25.2%) | 1123 (74.8%) |
|                                          | β-Blockers               |        | 419 (19.8%)  | 1699 (80.2%) |         | 249 (16.6%) | 1252 (83.4%) |
|                                          | Calcium channel blockers |        | 324 (15.3%)  | 1794 (84.7%) |         | 357 (23.8%) | 1144 (76.2%) |
|                                          | RAS inhibitors           |        | 1027 (48.5%) | 1091 (52.5%) |         | 932 (62.1%) | 569 (37.9%)  |
| Any Doctor-diagnosed diabetes            | RAS inhibitors           | 305    | 172 (56.4%)  | 133 (43.6%)  | 322     | 199 (61.8%) | 123 (38.2%)  |
| eGFR <60ml/min/1.73m <sup>2</sup> MDRD   | RAS inhibitors           | 521    | 279 (53.6%)  | 242 (46.4%)  | 349     | 205 (58.7%) | 144 (41.3%)  |
| eGFR <60ml/min/1.73m <sup>2</sup> CKDEPI | RAS inhibitors           | 444    | 273 (61.5%)  | 171 (38.5%)  | 303     | 199 (65.7%) | 104 (34.3%)  |
| All                                      | Lipid lowering           | 7810   | 484 (6.2%)   | 7326 (93.8%) | 5786    | 770 (13.3%) | 5016 (86.7%) |
